# Supplementary material
Source: PubMed Central journal article supplement (PMC7139272)
Supplement: jama-323-1277-s001.pdf [file jama-323-1277-s001.pdf]

## Supplementary Online Content

Lebwohl B, Green PHR, Söderling J, Roelstraete B, Ludvigsson JF. Association between Celiac disease and mortality risk in a Swedish population. *JAMA*. doi:10.1001/jama.2020.1943

**eTable 1.** Definitions of Celiac Disease and Normal Mucosa Using SNOMED Codes

**eTable 2.** Definitions of Cause-Specific Mortality

**eTable 3.** Definitions of Baseline Comorbidities Ever Before Start of Follow-up

**eTable 4.** Comorbidity at Baseline, During Follow-up and at Baseline or Follow-up, by Index Year in Celiac Disease and Matched Comparators

**eTable 5.** Narrowing the Definition of Celiac Disease

**eTable 6.** Celiac Disease With Positive Celiac Disease Serology vs Matched Comparators

**eTable 7.** Risk of All-Cause (Follow-up Until 31 Dec, 2017) and Cause-Specific (Follow-up Until 31 Dec, 2016) Mortality in Patients With Celiac Disease and Positive Celiac Disease Serology and Matched General Population Comparators

**eTable 8.** Celiac Disease Compared to Siblings: Baseline Characteristics of Study Cohort

**eTable 9.** Risk of All-Cause Mortality in Children (<18 Years) Diagnosed in 2010-2011 and in 2012-2014, Restricted to 3 Years of Follow-up

**eTable 10.** Baseline Characteristics of Study Cohort of Those With Mucosal Healing on Follow-up Biopsy Compared to Those With Persistent Villus Atrophy

**eTable 11.** Risk of All-Cause (Follow-up Until 31 Dec, 2017) and Cause-Specific (Follow-up Until 31 Dec, 2016) Mortality in Patients With Celiac Disease and Mucosal Healing vs Persistent Villus Atrophy

This supplementary material has been provided by the authors to give readers additional information about their work.

**eTable 1.** Definitions of Celiac Disease and Normal Mucosa Using SNOMED Codes

| Disease/Condition | Topographic code                    | SNOMED codes                                                                                |
|-------------------|-------------------------------------|---------------------------------------------------------------------------------------------|
| Celiac disease    | All T64, only T65, T65000, and T651 | D6218, D62180, D62188, D6218X, D6218Y<br>M58, M5800, M58000, M58001, M58005, M58006, M58007 |
| Normal mucosa     | Same as for Celiac disease          | M00100, M00110                                                                              |

**eTable 2.** Definitions of Cause-Specific Mortality

| Cause-specific mortality | ICD8<br>(1969-1986) | ICD9<br>(1987-1996) | ICD10<br>(1997-) |
|--------------------------|---------------------|---------------------|------------------|
| Cardiovascular disease   | 391-458             | 391-459             | I00-I99          |
| Cancer                   | 140-209             | 140-209             | C00-C99          |
| Respiratory disease      | 460-519             | 460-519             | J00-J99          |
| Other                    | Remaining           | Remaining           | Remaining        |

**eTable 3.** Definitions of Baseline Comorbidities Ever Before Start of Follow-up

| Comorbidity                | ICD7<br>(1964-1968)                                               | ICD8<br>(1969-1986)                               | ICD9<br>(1987-1996)             | ICD10<br>(1997-)                            |
|----------------------------|-------------------------------------------------------------------|---------------------------------------------------|---------------------------------|---------------------------------------------|
| Type 1 diabetes*           | 260                                                               | 250                                               | 250                             | E10                                         |
| Autoimmune thyroid disease | 252,00; 252,01; 252,02; 253,10;<br>253,19; 253,20; 253,29; 254,00 | 242,00; 242,09; 244; 245,03                       | 242A, 242X, 244X,<br>245C, 245W | E035, E039, E050, E055, E059,<br>E063, E065 |
| Rheumatoid arthritis       |                                                                   | 712,3; 714,93                                     | 714                             | M05, M06, M08, M123                         |
| Inflammatory bowel disease | 572,09; 572,20; 572,21                                            | 572,00; 572,09; 563,00;<br>572,20; 572,21; 563,10 | 555, 556                        | K50, K51, K523                              |

\*Age <31 years at date of diagnosis

**eTable 4.** Comorbidity at Baseline, During Follow-up and at Baseline or Follow-up, by Index Year in Celiac Disease and Matched Comparators

| Group                           | Celiac disease |            |              |              | Comparators  |            |              |              |
|---------------------------------|----------------|------------|--------------|--------------|--------------|------------|--------------|--------------|
|                                 | Overall        | 1969-1989  | 1990-2002    | 2003-2017    | Overall      | 1969-1989  | 1990-2002    | 2003-2017    |
| <b>n</b>                        | 49 829         | 4 339      | 19 222       | 26 268       | 246 426      | 21 604     | 95 105       | 129 717      |
| At baseline                     |                |            |              |              |              |            |              |              |
| DM1                             | 1 565 (3.1%)   | 53 (1.2%)  | 522 (2.7%)   | 990 (3.8%)   | 667 (0.3%)   | 21 (0.1%)  | 196 (0.2%)   | 450 (0.3%)   |
| ATD                             | 1 126 (2.3%)   | 34 (0.8%)  | 255 (1.3%)   | 837 (3.2%)   | 1 852 (0.8%) | 39 (0.2%)  | 370 (0.4%)   | 1 443 (1.1%) |
| RA                              | 423 (0.8%)     | 35 (0.8%)  | 127 (0.7%)   | 261 (1.0%)   | 1 096 (0.4%) | 56 (0.3%)  | 322 (0.3%)   | 718 (0.6%)   |
| IBD                             | 1 401 (2.8%)   | 212 (4.9%) | 554 (2.9%)   | 635 (2.4%)   | 365 (0.1%)   | 29 (0.1%)  | 146 (0.2%)   | 190 (0.1%)   |
| During follow-up                |                |            |              |              |              |            |              |              |
| DM1                             | 340 (0.7%)     | 47 (1.1%)  | 148 (0.8%)   | 145 (0.6%)   | 561 (0.2%)   | 68 (0.3%)  | 309 (0.3%)   | 184 (0.1%)   |
| ATD                             | 2 662 (5.3%)   | 331 (7.6%) | 1 370 (7.1%) | 961 (3.7%)   | 5 532 (2.2%) | 795 (3.7%) | 2 946 (3.1%) | 1 791 (1.4%) |
| RA                              | 573 (1.1%)     | 84 (1.9%)  | 316 (1.6%)   | 173 (0.7%)   | 1 850 (0.8%) | 309 (1.4%) | 1 053 (1.1%) | 488 (0.4%)   |
| IBD                             | 1 098 (2.2%)   | 150 (3.5%) | 526 (2.7%)   | 422 (1.6%)   | 1 550 (0.6%) | 263 (1.2%) | 811 (0.9%)   | 476 (0.4%)   |
| At baseline or during follow-up |                |            |              |              |              |            |              |              |
| DM1                             | 1 907 (3.8%)   | 101 (2.3%) | 670 (3.5%)   | 1 136 (4.3%) | 1 228 (0.5%) | 89 (0.4%)  | 505 (0.5%)   | 634 (0.5%)   |
| ATD                             | 3 796 (7.6%)   | 365 (8.4%) | 1 628 (8.5%) | 1 803 (6.9%) | 7 386 (3.0%) | 834 (3.9%) | 3 316 (3.5%) | 3 236 (2.5%) |
| RA                              | 997 (2.0%)     | 120 (2.8%) | 443 (2.3%)   | 434 (1.7%)   | 2 947 (1.2%) | 365 (1.7%) | 1 375 (1.4%) | 1 207 (0.9%) |
| IBD                             | 2 512 (5.0%)   | 362 (8.3%) | 1 084 (5.6%) | 1 066 (4.1%) | 1 915 (0.8%) | 292 (1.4%) | 957 (1.0%)   | 666 (0.5%)   |

DM1: Type 1 diabetes, ATD: Autoimmune thyroid disease, RA: Rheumatoid arthritis, IBD: Inflammatory bowel disease

**eTable 5. Narrowing the Definition of Celiac Disease**

| Analysis                                                                                                                                                                                                                                | N (%)             |                    | N events         |                   | Incidence rate (95% CI)<br>per 1000 PY |               | HR*<br>(95% CI)  | HR**<br>(95% CI) |
|-----------------------------------------------------------------------------------------------------------------------------------------------------------------------------------------------------------------------------------------|-------------------|--------------------|------------------|-------------------|----------------------------------------|---------------|------------------|------------------|
|                                                                                                                                                                                                                                         | Celiac disease    | Comparators        | Celiac disease   | Comparators       | Celiac disease                         | Comparators   |                  |                  |
| Main analysis                                                                                                                                                                                                                           | 49 829<br>(100%)  | 246 426<br>(100%)  | 6 596<br>(13.2%) | 28 890<br>(11.7%) | 9.7<br>(9.5-9.9)                       | 8.6 (8.5-8.7) | 1.21 (1.17-1.25) | 1.14 (1.11-1.18) |
| Exclusion of GI-cancer and IBD                                                                                                                                                                                                          | 48 441<br>(97.2%) | 239 580<br>(97.2%) | 6 234<br>(12.9%) | 27 730<br>(11.6%) | 9.4<br>(9.2-9.7)                       | 8.5 (8.4-8.6) | 1.18 (1.15-1.22) | 1.13 (1.09-1.16) |
| Including Celiac disease diagnosis# within 6 months of biopsy                                                                                                                                                                           | 22 115<br>(44.4%) | 109 697<br>(44.5%) | 1 428<br>(6.5%)  | 6 204 (5.7%)      | 5.7<br>(5.4-6.0)                       | 5.0 (4.9-5.1) | 1.24 (1.16-1.32) | 1.17 (1.09-1.24) |
| *Conditioned on matching set (age, sex, county, and calendar period);                                                                                                                                                                   |                   |                    |                  |                   |                                        |               |                  |                  |
| **Conditioned on matching set and further adjusted for education, Nordic country of birth, and time dependent medical comorbidities (Type 1 diabetes, Autoimmune thyroid disease, Rheumatoid arthritis, and Inflammatory bowel disease) |                   |                    |                  |                   |                                        |               |                  |                  |

#Diagnosis from Swedish National Patient Register

GI, gastrointestinal. IBD, inflammatory bowel disease.

**eTable 6.** Celiac Disease With Positive Celiac Disease Serology vs Matched Comparators

| <b>Characteristic</b>                                                                         | <b>Celiac disease<br/>(n=3 307)</b> | <b>Matched comparators<br/>(n=15 853)</b> |
|-----------------------------------------------------------------------------------------------|-------------------------------------|-------------------------------------------|
| Women, no. (%)                                                                                | 2 154 (65.1%)                       | 10 399 (65.6%)                            |
| Men, no (%)                                                                                   | 1 153 (34.9%)                       | 5 454 (34.4%)                             |
| <b>Age</b>                                                                                    |                                     |                                           |
| Mean (SD)                                                                                     | 25.8 (24.3)                         | 24.4 (23.4)                               |
| Median (IQR)                                                                                  | 15.3 (3.7-46.6)                     | 14.0 (3.5-43.6)                           |
| Range, min-max                                                                                | 0.6-89.8                            | 0.0-89.9                                  |
| <b>Categories, no. (%)</b>                                                                    |                                     |                                           |
| <18y                                                                                          | 1 756 (53.1%)                       | 8 738 (55.1%)                             |
| 18y - <40y                                                                                    | 557 (16.8%)                         | 2 696 (17.0%)                             |
| 40y - <60y                                                                                    | 583 (17.6%)                         | 2 740 (17.3%)                             |
| ≥60y                                                                                          | 411 (12.4%)                         | 1 679 (10.6%)                             |
| <b>Country of birth, no (%)</b>                                                               |                                     |                                           |
| Nordic country                                                                                | 3 252 (98.3%)                       | 15 084 (95.1%)                            |
| Other                                                                                         | 55 (1.7%)                           | 769 (4.9%)                                |
| Missing                                                                                       | 0                                   | 0                                         |
| <b>Level of education, no (%)</b>                                                             |                                     |                                           |
| ≤9 years                                                                                      | 417 (12.6%)                         | 2 140 (13.5%)                             |
| 10-12 years                                                                                   | 651 (19.7%)                         | 3 241 (20.4%)                             |
| >12 years                                                                                     | 550 (16.6%)                         | 2 023 (12.8%)                             |
| Missing                                                                                       | 1 689 (51.1%)                       | 8 449 (53.3%)                             |
| <b>Level of education using highest level of education in<br/>parents when missing, n (%)</b> |                                     |                                           |
| ≤9 years                                                                                      | 449 (13.6%)                         | 2 514 (15.9%)                             |
| 10-12 years                                                                                   | 1 372 (41.5%)                       | 6 802 (42.9%)                             |
| >12 years                                                                                     | 1 470 (44.5%)                       | 6 431 (40.6%)                             |
| Missing                                                                                       | 16 (0.5%)                           | 106 (0.7%)                                |
| <b>Start year of follow-up</b>                                                                |                                     |                                           |
| 1969-1989                                                                                     | 1 (0.0%)                            | 5 (0.0%)                                  |
| 1990-1999                                                                                     | 1 205 (36.4%)                       | 5 803 (36.6%)                             |
| 2000-2009                                                                                     | 2 101 (63.5%)                       | 10 045 (63.4%)                            |
| 2010-2017                                                                                     | 0                                   | 0                                         |
| <b>Disease history ever before start of follow-up, no. (%)</b>                                |                                     |                                           |
| Type 1 diabetes                                                                               | 134 (4.1%)                          | 46 (0.3%)                                 |
| Autoimmune thyroid disease                                                                    | 56 (1.7%)                           | 72 (0.5%)                                 |
| Rheumatoid arthritis                                                                          | 22 (0.7%)                           | 65 (0.4%)                                 |
| Inflammatory bowel disease                                                                    | 26 (0.8%)                           | 51 (0.3%)                                 |
| <b>Deaths</b>                                                                                 |                                     |                                           |
| ≤30 days after index date                                                                     | 0                                   | 4 (0.0%)                                  |
| ≤90 days after index date                                                                     | 2 (0.1%)                            | 11 (0.1%)                                 |
| ≤365 days after index date                                                                    | 16 (0.5%)                           | 47 (0.3%)                                 |
| All follow-up time                                                                            | 289 (8.7%)                          | 1 171 (7.4%)                              |

**eTable 7.** Risk of All-Cause (Follow-up Until 31 Dec, 2017) and Cause-Specific (Follow-up Until 31 Dec, 2016) Mortality in Patients With Celiac Disease and Positive Celiac Disease Serology and Matched General Population Comparators

|                                     | All-cause mortality |                     | Cardiovascular disease |                     | Cancer              |                     | Respiratory disease |                     | Other cause of death |                     |
|-------------------------------------|---------------------|---------------------|------------------------|---------------------|---------------------|---------------------|---------------------|---------------------|----------------------|---------------------|
|                                     | Celiac disease      | Comparators         | Celiac disease         | Comparators         | Celiac disease      | Comparators         | Celiac disease      | Comparators         | Celiac disease       | Comparators         |
| N                                   | 3 307               | 15 853              | 3 307                  | 15 853              | 3 307               | 15 853              | 3 307               | 15 853              | 3 307                | 15 853              |
| Deaths, no (%)                      | 289 (8.7%)          | 1 171 (7.4%)        | 92 (2.8%)              | 344 (2.2%)          | 72 (2.2%)           | 325 (2.1%)          | 18 (0.5%)           | 65 (0.4%)           | 85 (2.6%)            | 345 (2.2%)          |
| Follow-up years                     |                     |                     |                        |                     |                     |                     |                     |                     |                      |                     |
| Mean (SD)                           | 16.0 (5.2)          | 15.9 (5.3)          | 15.1 (5.1)             | 15.0 (5.1)          | 15.1 (5.1)          | 15.0 (5.1)          | 15.1 (5.1)          | 15.0 (5.1)          | 15.1 (5.1)           | 15.0 (5.1)          |
| Median (IQR)                        | 15.5<br>(12.6-19.2) | 15.4<br>(12.6-19.2) | 14.6<br>(11.6-18.3)    | 14.5<br>(11.6-18.2) | 14.6<br>(11.6-18.3) | 14.5<br>(11.6-18.2) | 14.6<br>(11.6-18.3) | 14.5<br>(11.6-18.2) | 14.6<br>(11.6-18.3)  | 14.5<br>(11.6-18.2) |
| Incidence rate per 1000 PY (95% CI) | 5.5 (4.8-6.1)       | 4.7 (4.4-4.9)       | 1.8 (1.5-2.2)          | 1.4 (1.3-1.6)       | 1.4 (1.1-1.8)       | 1.4 (1.2-1.5)       | 0.4 (0.2-0.5)       | 0.3 (0.2-0.3)       | 1.7 (1.3-2.1)        | 1.5 (1.3-1.6)       |
| Hazard ratio (95% CI)               |                     |                     |                        |                     |                     |                     |                     |                     |                      |                     |
| Conditioned                         | 1.02 (0.89-1.17)    |                     | 1.01 (0.78-1.30)       |                     | 0.99 (0.76-1.29)    |                     | 1.32 (0.74-2.36)    |                     | 1.00 (0.77-1.29)     |                     |
| Adjusted                            | 0.98 (0.85-1.14)    |                     | 0.99 (0.76-1.29)       |                     | 0.95 (0.72-1.25)    |                     | 1.63 (0.87-3.06)    |                     | 0.98 (0.74-1.29)     |                     |

Conditioned: Conditioned on matching set (age, sex, county, and calendar period);

Adjusted: Conditioned on matching set and further adjusted for education, Nordic country of birth, and time dependent medical comorbidities (Type 1 diabetes, Autoimmune thyroid disease, Rheumatoid arthritis, and Inflammatory bowel disease)

**eTable 8. Celiac Disease Compared to Siblings: Baseline Characteristics of Study Cohort**

| <b>Characteristic</b>                                                              | <b>Celiac disease<br/>(n=32 558)</b> | <b>Siblings<br/>(n=56 442)</b> |
|------------------------------------------------------------------------------------|--------------------------------------|--------------------------------|
| Women, no. (%)                                                                     | 20 608 (63.3%)                       | 27 565 (48.8%)                 |
| Men, no (%)                                                                        | 11 950 (36.7%)                       | 28 877 (51.2%)                 |
| Age                                                                                |                                      |                                |
| Mean (SD)                                                                          | 27.1 (21.0)                          | 30.6 (20.8)                    |
| Median (IQR)                                                                       | 22.6 (8.2-44.2)                      | 28.6 (11.5-48.1)               |
| Range, min-max                                                                     | 0.0-84.1                             | 0.0-83.5                       |
| Categories, no. (%)                                                                |                                      |                                |
| <18y                                                                               | 14 241 (43.7%)                       | 20 255 (35.9%)                 |
| 18y - <40y                                                                         | 8 612 (26.5%)                        | 15 850 (28.1%)                 |
| 40y - <60y                                                                         | 6 881 (21.1%)                        | 14 707 (26.1%)                 |
| ≥60y                                                                               | 2 824 (8.7%)                         | 5 630 (10.0%)                  |
| Country of birth, no (%)                                                           |                                      |                                |
| Nordic country                                                                     | 32 063 (98.5%)                       | 55 061 (97.6%)                 |
| Other                                                                              | 494 (1.5%)                           | 1 374 (2.4%)                   |
| Missing                                                                            | 1 (0.0%)                             | 7 (0.0%)                       |
| Level of education, no (%)                                                         |                                      |                                |
| ≤9 years                                                                           | 4 519 (13.9%)                        | 9 377 (16.6%)                  |
| 10-12 years                                                                        | 8 032 (24.7%)                        | 16 019 (28.4%)                 |
| >12 years                                                                          | 5 794 (17.8%)                        | 9 412 (16.7%)                  |
| Missing                                                                            | 14 213 (43.7%)                       | 21 634 (38.3%)                 |
| Level of education using highest level of education in parents when missing, n (%) |                                      |                                |
| ≤9 years                                                                           | 5 409 (16.6%)                        | 12 017 (21.3%)                 |
| 10-12 years                                                                        | 13 673 (42.0%)                       | 24 289 (43.0%)                 |
| >12 years                                                                          | 13 118 (40.3%)                       | 19 302 (34.2%)                 |
| Missing                                                                            | 358 (1.1%)                           | 834 (1.5%)                     |
| Start year of follow-up                                                            |                                      |                                |
| 1969-1989                                                                          | 2 261 (6.9%)                         | 4 161 (7.4%)                   |
| 1990-1999                                                                          | 7 874 (24.2%)                        | 14 167 (25.1%)                 |
| 2000-2009                                                                          | 13 598 (41.8%)                       | 23 602 (41.8%)                 |
| 2010-2017                                                                          | 8 825 (27.1%)                        | 14 512 (25.7%)                 |
| Disease history ever before start of follow-up, no. (%)                            |                                      |                                |
| Type 1 diabetes                                                                    | 1 278 (3.9%)                         | 431 (0.8%)                     |
| Autoimmune thyroid disease                                                         | 629 (1.9%)                           | 523 (0.9%)                     |
| Rheumatoid arthritis                                                               | 221 (0.7%)                           | 280 (0.5%)                     |
| Inflammatory bowel disease                                                         | 963 (3.0%)                           | 426 (0.8%)                     |
| Deaths                                                                             |                                      |                                |
| ≤30 days after index date                                                          | 16 (0.0%)                            | 14 (0.0%)                      |
| ≤90 days after index date                                                          | 49 (0.2%)                            | 39 (0.1%)                      |
| ≤365 days after index date                                                         | 163 (0.5%)                           | 133 (0.2%)                     |
| All follow-up time                                                                 | 1 580 (4.9%)                         | 2 696 (4.8%)                   |

**eTable 9.** Risk of All-Cause Mortality in Children (<18 Years) Diagnosed in 2010-2011 and in 2012-2014, Restricted to 3 Years of Follow-up

| Group          | N (%)          |               | Time at risk (years) |             | N events       |             | Mortality rate (95% CI) |               | HR*<br>(95%CI)    | HR**<br>(95%CI)   |
|----------------|----------------|---------------|----------------------|-------------|----------------|-------------|-------------------------|---------------|-------------------|-------------------|
|                | Celiac disease | Comparators   | Celiac disease       | Comparators | Celiac disease | Comparators | Celiac disease          | Comparators   |                   |                   |
| <b>Overall</b> | 3 682 (100%)   | 18 412 (100%) | 11 011               | 54 829      | 3 (0.1%)       | 10 (0.1%)   | 0.3 (0.0-0.6)           | 0.2 (0.1-0.3) | 1.67 (0.45-6.16)  | 2.92 (1.13-30.25) |
| Year           |                |               |                      |             |                |             |                         |               |                   |                   |
| 2010-2011      | 1 770 (48.1%)  | 8 841 (48.0%) | 5 294                | 26 316      | 2 (0.1%)       | 6 (0.1%)    | 0.4 (0.0-0.9)           | 0.2 (0.0-0.4) | 1.67 (0.34-8.26)  | 2.23 (0.31-15.82) |
| 2012-2014      | 1 912 (51.9%)  | 9 571 (52.0%) | 5 716                | 28 513      | 1 (0.1%)       | 4 (0.0%)    | 0.2 (0.0-0.5)           | 0.1 (0.0-0.3) | 1.67 (0.17-16.02) | NC                |

\*Conditioned on matching set;

\*\*Conditioned on matching set and adjusted for education and time dependent medical comorbidities (Type 1 diabetes [DM1], Autoimmune thyroid disease [ATD], Rheumatoid arthritis [RA], Inflammatory bowel disease [IBD])

NC, not calculated due to lack of convergence of the model

**eTable 10.** Baseline Characteristics of Study Cohort of Those With Mucosal Healing on Follow-up Biopsy Compared to Those With Persistent Villus Atrophy

| <b>Characteristic</b>                                                                     | <b>Mucosal healing<br/>(n=6 924)</b> | <b>Persistent villus atrophy<br/>(n=2 919)</b> |
|-------------------------------------------------------------------------------------------|--------------------------------------|------------------------------------------------|
| Women, no. (%)                                                                            | 4 494 (64.9%)                        | 1 728 (59.2%)                                  |
| Men, no (%)                                                                               | 2 430 (35.1%)                        | 1 191 (40.8%)                                  |
| <b>Age</b>                                                                                |                                      |                                                |
| Mean (SD)                                                                                 | 32.8 (22.6)                          | 44.0 (24.1)                                    |
| Median (IQR)                                                                              | 30.7 (12.4-50.9)                     | 47.7 (24.8-64.1)                               |
| Range, min-max                                                                            | 1.0-91.3                             | 1.1-90.9                                       |
| <b>Categories, no. (%)</b>                                                                |                                      |                                                |
| <18y                                                                                      | 2 150 (31.1%)                        | 567 (19.4%)                                    |
| 18y - <40y                                                                                | 2 162 (31.2%)                        | 576 (19.7%)                                    |
| 40y - <60y                                                                                | 1 584 (22.9%)                        | 860 (29.5%)                                    |
| ≥60y                                                                                      | 1 028 (14.8%)                        | 916 (31.4%)                                    |
| <b>Duration since diagnosis, years</b>                                                    |                                      |                                                |
| Mean (SD)                                                                                 | 1.7 (1.5)                            | 1.6 (1.7)                                      |
| Median (IQR)                                                                              | 1.3 (1.0-2.0)                        | 1.2 (0.9-1.8)                                  |
| Range, min-max                                                                            | 0.5-30.8                             | 0.5-27.0                                       |
| <b>Country of birth, no (%)</b>                                                           |                                      |                                                |
| Nordic country                                                                            | 6 613 (95.5%)                        | 2 786 (95.4%)                                  |
| Other                                                                                     | 311 (4.5%)                           | 133 (4.6%)                                     |
| Missing                                                                                   | 0                                    | 0                                              |
| <b>Level of education, no (%)</b>                                                         |                                      |                                                |
| ≤9 years                                                                                  | 1 117 (16.1%)                        | 696 (23.8%)                                    |
| 10-12 years                                                                               | 2 955 (42.7%)                        | 1 233 (42.2%)                                  |
| >12 years                                                                                 | 2 725 (39.4%)                        | 876 (30.0%)                                    |
| Missing                                                                                   | 127 (1.8%)                           | 114 (3.9%)                                     |
| <b>Level of education using highest level of education in parents when missing, n (%)</b> |                                      |                                                |
| ≤9 years                                                                                  | 1 111 (16.0%)                        | 695 (23.8%)                                    |
| 10-12 years                                                                               | 2 848 (41.1%)                        | 1 211 (41.5%)                                  |
| >12 years                                                                                 | 2 570 (37.1%)                        | 852 (29.2%)                                    |
| Missing                                                                                   | 395 (5.7%)                           | 161 (5.5%)                                     |
| <b>Start year of follow-up</b>                                                            |                                      |                                                |
| 1969-1989                                                                                 | 240 (3.5%)                           | 174 (6.0%)                                     |
| 1990-1999                                                                                 | 1 549 (22.4%)                        | 855 (29.3%)                                    |
| 2000-2009                                                                                 | 3 093 (44.7%)                        | 1 157 (39.6%)                                  |
| 2010-2017                                                                                 | 2 042 (29.5%)                        | 733 (25.1%)                                    |
| <b>Disease history ever before start of follow-up, no. (%)</b>                            |                                      |                                                |
| Type 1 diabetes                                                                           | 156 (2.3%)                           | 49 (1.7%)                                      |
| Autoimmune thyroid disease                                                                | 227 (3.3%)                           | 81 (2.8%)                                      |
| Rheumatoid arthritis                                                                      | 57 (0.8%)                            | 28 (1.0%)                                      |
| Inflammatory bowel disease                                                                | 336 (4.9%)                           | 176 (6.0%)                                     |
| <b>Deaths</b>                                                                             |                                      |                                                |
| ≤30 days after index date                                                                 | 4 (0.1%)                             | 1 (0.0%)                                       |
| ≤90 days after index date                                                                 | 14 (0.2%)                            | 9 (0.3%)                                       |
| ≤365 days after index date                                                                | 36 (0.5%)                            | 35 (1.2%)                                      |
| All follow-up time                                                                        | 497 (7.2%)                           | 479 (16.4%)                                    |

**eTable 11.** Risk of All-Cause (Follow-up Until 31 Dec, 2017) and Cause-Specific (Follow-up Until 31 Dec, 2016) Mortality in Patients With Celiac Disease and Mucosal Healing vs Persistent Villus Atrophy

|                                     | All-cause mortality |                  | Cardiovascular disease |                 | Cancer           |                 | Respiratory disease |                 | Other cause of death |                 |
|-------------------------------------|---------------------|------------------|------------------------|-----------------|------------------|-----------------|---------------------|-----------------|----------------------|-----------------|
|                                     | Healing             | Persistent VA    | Healing                | Persistent VA   | Healing          | Persistent VA   | Healing             | Persistent VA   | Healing              | Persistent VA   |
| N                                   | 6 924               | 2 919            | 6 915                  | 2 913           | 6 915            | 2 913           | 6 915               | 2 913           | 6 915                | 2 913           |
| Deaths, no (%)                      | 497 (7.2%)          | 479 (16.4%)      | 151 (2.2%)             | 137 (4.7%)      | 132 (1.9%)       | 141 (4.8%)      | 32 (0.5%)           | 32 (1.1%)       | 148 (2.1%)           | 134 (4.6%)      |
| Follow-up years                     |                     |                  |                        |                 |                  |                 |                     |                 |                      |                 |
| Mean (SD)                           | 12.3 (7.4)          | 13.2 (8.1)       | 11.4 (7.3)             | 12.4 (8.0)      | 11.4 (7.3)       | 12.4 (8.0)      | 11.4 (7.3)          | 12.4 (8.0)      | 11.4 (7.3)           | 12.4 (8.0)      |
| Median (IQR)                        | 11.6 (6.1-17.1)     | 12.2 (6.5-18.9)  | 10.7 (5.3-16.2)        | 11.4 (5.7-18.1) | 10.7 (5.3-16.2)  | 11.4 (5.7-18.1) | 10.7 (5.3-16.2)     | 11.4 (5.7-18.1) | 10.7 (5.3-16.2)      | 11.4 (5.7-18.1) |
| Incidence rate per 1000 PY (95% CI) | 5.8 (5.3-6.3)       | 12.5 (11.3-13.6) | 1.9 (1.6-2.2)          | 3.8 (3.2-4.4)   | 1.7 (1.4-2.0)    | 3.9 (3.3-4.6)   | 0.4 (0.3-0.5)       | 0.9 (0.6-1.2)   | 1.9 (1.6-2.2)        | 3.7 (3.1-4.3)   |
| Hazard ratio (95% CI)               |                     |                  |                        |                 |                  |                 |                     |                 |                      |                 |
| Adjusted                            | 0.99 (0.87-1.13)    |                  | 1.18 (0.93-1.49)       |                 | 0.82 (0.65-1.05) |                 | 1.03 (0.63-1.71)    |                 | 1.00 (0.79-1.27)     |                 |

Adjusted: Adjusted for age, sex, start year of follow-up, duration since diagnosis, education, Nordic country of birth, and time dependent medical comorbidities (Type 1 diabetes, Autoimmune thyroid disease, Rheumatoid arthritis, and Inflammatory bowel disease)

VA, villus atrophy
